# Supplementary material for: Characterization of the Exopolysaccharide Biosynthesis Pathway in Myxococcus xanthus
Source: PubMed Central journal article supplement (PMC7484181; doi:10.1128/jb.00335-20), 2020-09-08
Supplement: JB.00335-20-s0001.pdf [file JB.00335-20-s0001.pdf]

## Supplementary Material

### Characterization of the exopolysaccharide biosynthesis pathway in *Myxococcus xanthus*

María Pérez-Burgos, Inmaculada García-Romero, Jana Jung, Eugenia Schander,

Miguel A. Valvano, and Lotte Søgaard-Andersen

#### **This file contains:**

Supplementary Figure 1

Supplementary Experimental Procedures

Table S1-S3

Supplementary References

## Supplemental Figures & Legends

**A**

**WbaP<sub>Se</sub>**    - - - - - MDN IDNK    YNPQLCK IFL    A ISDL IFFNL    ALWFS LGCVY    F IFDQVQRFI    PQDQLDTRVI    57  
**EpsZ**        MDTMSGATAS    AAVVGAPGSA    NAQQQVIEEV    QGPPK LAPGS    AAKLNLTVDL    VLLSSVLVGS    AWLSGQLSAE    SGWKVSGLVL    80

**WbaP<sub>Se</sub>**    THF ILSVVCV    GFWIWLRLHY    TYRKPFWYEL    KEIFRTIVIF    AIFDLALIAF    TKWQFSRYVW    VFCWTFALIL    VPFFRALTGH    137  
**EpsZ**        AAWVVWIVTG    TALCLYDSRF    AERSKLDHVA    LVSVTTLAVV    TVLTLGSAV    PTVVTSPVVG    PLLFIFWPVT    LLLRFLVFRP    160

**WbaP<sub>Se</sub>**    LLNKLGIWKK    KTIILGSGQN    ARGAYSALQS    EEMMGFDVIA    FFDTDASDAE    INMLP - - VIK    DTEI IIDLNR    - - TGDVHYIL    213  
**EpsZ**        VASQE - - - RP    MDAVLIVGTG    AMGRYTGEDL    ANRRRRQILG    YVRFHDDNGS    VGELPGPVMG    SVDDLEHILR    NTAVDEVYIA    237

**WbaP<sub>Se</sub>**    AYEYTELEKT    HFWLRELSKH    HCRSVTVVPS    FRGLPLYNTD    MSFIFSHEVM    LLRIQNNLAK    RSSRFLKRTF    **D**IVCSIMILI    293  
**EpsZ**        GNTLKQGESM    QAAIKLAERF    GVPFALPAHS    FRLDRARPVE    RRAVADGFLH    FAAVS - - - PK    PHQMAMKRLF    **D**ICVSAALW    314

**WbaP<sub>Se</sub>**    IAS**P**LMIYLW    YKVTRDG - GP    AIYGH**R**VGR    HGKLFPCY**K**F    **R**SMVMNSQEV    LKELLANDPI    ARAWEKDFK    LKN**D**P**R**ITAV    372  
**EpsZ**        ALL**P**LLGMVA    LAVKFTSKGP    IFFK**L**R**V**GQ    NGKPFY**M**L**K**F    **R**SMVVAEEL    KEKLAALN - -    - - EQTGPVFK    MKH**D**P**R**ITGI    390

**WbaP<sub>Se</sub>**    GRFIR**K**TS**L**D    **E**LP**O**LFNVLK    GDMSLVGP**R**P    IVSDELERYC    DDVDYYLMAK    PGMTGLWQVS    GRNDVDYDTR    VYFDSW**V**YKN    452  
**EpsZ**        GRFIR**K**FS**I**D    **E**LP**O**FINVLR    GEMSVGP**R**P    PVPTEVAKYE    TWQRRRLSVR    PGLTCIWQVS    GRNQISFEW    MYLDM**Q**YIDH    470

**WbaP<sub>Se</sub>**    WTLWN**D**IAIL    FKTAKVVLRR    DGAY    476  
**EpsZ**        WSLTS**D**LRL    LQTVPVVLTG    RGAS    494

**B**

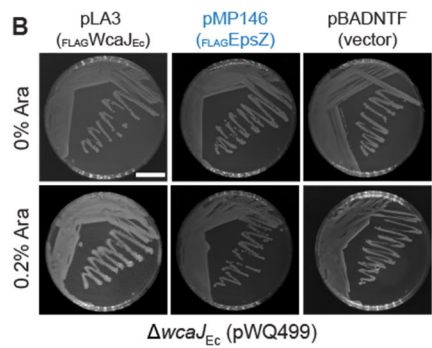

**Figure S1.** Characterization of MXAN\_7415.

(A) Sequence alignment of EpsZ (MXAN\_715) and WbaP<sub>Se</sub> (Accession number: NP\_461027.1) showing the Pro and Asp (orange) residues in the motif DX<sub>12</sub>P and the conserved amino acids essential for catalytic activity (red). (B) Complementation of colanic acid synthesis in *E. coli* K-12 W3110 ( $\Delta wcaJ_{Ec}$ ) by plasmids encoding the indicated PHPT proteins as in Fig. 5C. Scale bar: 2 cm.

## Supplementary Experimental Procedures

Plasmid construction. All oligonucleotides used are listed in Table S3. All constructed plasmids were verified by DNA sequencing.

**pMP001** (for generation of in-frame deletion of *MXAN\_7415*): up- and downstream fragments were amplified from genomic DNA of DK1622 using the primer pairs 7415\_A/7415\_B and 7415\_C/7415\_D respectively, as described in (1). Subsequently, the AB and CD fragments were used as templates to perform an overlapping PCR with the primer pair 7415\_A/7415\_D to generate the AD fragment. The AD fragment was digested with KpnI/XbaI and cloned in pBJ114.

**pMP012** (for generation of in-frame deletion of *MXAN\_7421*): up- and downstream fragments were amplified from genomic DNA of DK1622 using the primer pairs 7421\_A/7421\_B and 7421\_C/7421\_D respectively. Subsequently, the AB and CD fragments were used as templates to perform an overlapping PCR with the primer pair 7421\_A/7421\_D to generate the AD fragment. The AD fragment was digested with KpnI/XbaI and cloned in pBJ114.

**pMP015** (for generation of in-frame deletion of *MXAN\_7442*): up- and downstream fragments were amplified from genomic DNA of DK1622 using the primer pairs 7442\_A/7442\_B and 7442\_C/7442\_D respectively. Subsequently, the AB and CD fragments were used as templates to perform an overlapping PCR with the primer pair 7442\_A/7442\_D to generate the AD fragment. The AD fragment was digested with KpnI/XbaI and cloned in pBJ114.

**pMP016** (for generation of in-frame deletion of *MXAN\_7416*): up- and downstream fragments were amplified from genomic DNA of DK1622 using the primer pairs 7416\_A/7416\_B and 7416\_C/7416\_D respectively. Subsequently, the AB and CD fragments were used as templates to perform an overlapping PCR with the primer pair 7416\_A/7416\_D to generate the AD fragment. The AD fragment was digested with KpnI/XbaI and cloned in pBJ114.

**pMP018** (for generation of in-frame deletion of *MXAN\_7417*): up- and downstream fragments were amplified from genomic DNA of DK1622 using the primer pairs 7417\_A/7417\_B and 7417\_C/7417\_D respectively. Subsequently, the AB and CD fragments were used as templates to perform an overlapping PCR with the primer pair 7417\_A/7417\_D to generate the AD fragment. The AD fragment was digested with EcoRI/XbaI and cloned in pBJ114.

**pMP021** (expression of  $P_{nat}$  *MXAN\_7415* from the *attB* site):  $P_{nat}$  *MXAN\_7415* was amplified with the primer combination 7415 Pnat900 forw2/7415 Pnat rev and genomic DNA from *M. xanthus*

DK1622 as a template. The fragment was digested with KpnI and XbaI, cloned into pSWU30 and sequenced.

**pMP024** (expression of  $P_{nat}$  *MXAN\_7416* from the *attB* site):  $P_{nat}$  *MXAN\_7416* was amplified with the primer combination 7416\_Pnat forw2/7416\_Pnat rev and genomic DNA from *M. xanthus* DK1622 as a template. The fragment was digested with HindIII and XbaI, cloned into pSWU30 and sequenced.

**pMP030** (expression of  $P_{pilA}$  *MXAN\_7417* from the *attB* site): *MXAN\_7417* was amplified with the primer combination 7417\_PpilA forw/7417\_PpilA rev and genomic DNA from *M. xanthus* DK1622 as a template. The fragment was digested with XbaI and HindIII, cloned into pSW105 and sequenced.

**pMP032** (expression of  $P_{pilA}$  *MXAN\_7421* from the *attB* site): *MXAN\_7421* was amplified with the primer combination 7421\_PpilA forw/7421\_PpilA rev and genomic DNA from *M. xanthus* DK1622 as a template. The fragment was digested with XbaI and HindIII, cloned into pSW105 and sequenced.

**pMP091** (expression of  $P_{nat}$  *MXAN\_7442* from the *attB* site):  $P_{nat}$  *MXAN\_7442* was amplified with the primer combination 7442\_Pnat 600 up /7442\_Pnat rev and genomic DNA from *M. xanthus* DK1622 as a template. The fragment was digested with HindIII and XbaI, cloned into pSWU30 and sequenced.

**pMP124** (for generation of in-frame deletion of *MXAN\_1043*): up- and downstream fragments were amplified from genomic DNA of DK1622 using the primer pairs 1043\_A/1043\_B and 1043\_C/1043\_D respectively. Subsequently, the AB and CD fragments were used as templates to perform an overlapping PCR with the primer pair 1043\_A/1043\_D to generate the AD fragment. The AD fragment was digested with EcoRI/HindIII and cloned in pBJ114.

**pMP146** (expression of *MXAN\_7415* under the control of an arabinose promoter): *MXAN\_7415* was amplified with the primer combination 7415 fw +1/ 7415 rev new (pilA) and genomic DNA from *M. xanthus* DK1622 as a template. The fragment was digested with XbaI and HindIII, cloned into pBADNTF and sequenced.

**pJJ1** (for generation of in-frame deletion of *MXAN\_1035*): up- and downstream fragments were amplified from genomic DNA of DK1622 using the primer pairs 1035\_A/1035\_B and 1035\_C/1035\_D respectively. Subsequently, the AB and CD fragments were used as templates

to perform an overlapping PCR with the primer pair 1035\_A/1035\_D to generate the AD fragment. The AD fragment was digested with KpnI/XbaI and cloned in pBJ114.

**pJJ2** (for generation of in-frame deletion of *MXAN\_1025*): up- and downstream fragments were amplified from genomic DNA of DK1622 using the primer pairs 1025\_A/1025\_B and 1025\_C/1025\_D respectively. Subsequently, the AB and CD fragments were used as templates to perform an overlapping PCR with the primer pair 1025\_A/1025\_D to generate the AD fragment. The AD fragment was digested with KpnI/XbaI and cloned in pBJ114.

**pJJ3** (for generation of in-frame deletion of *MXAN\_1052*): up- and downstream fragments were amplified from genomic DNA of DK1622 using the primer pairs 1025\_A/1025\_B and 1052\_C/1052\_D respectively. Subsequently, the AB and CD fragments were used as templates to perform an overlapping PCR with the primer pair 1052\_A/1052\_D to generate the AD fragment. The AD fragment was digested with KpnI/BamHI and cloned in pBJ114.

**pJJ4** (for generation of in-frame deletion of *MXAN\_1915*): up- and downstream fragments were amplified from genomic DNA of DK1622 using the primer pairs 1915\_A/1915\_B and 1915\_C/1915\_D respectively. Subsequently, the AB and CD fragments were used as templates to perform an overlapping PCR with the primer pair 1915\_A/1915\_D to generate the AD fragment. The AD fragment was digested with KpnI/XbaI and cloned in pBJ114.

**pMAT150** (for generation of in-frame deletion of *pilT*): up- and downstream fragments were amplified from genomic DNA of DK10409 ( $\Delta pilT$ ) using the primer pairs pilT-A EcoRI/ pilT-D HindIII. The AD fragment was digested with EcoRI/HindIII and cloned in pBJ114.

**Table S1.** Analysis of the *eps* locus

| Locus tag<br>MXAN | Gene name                                  | (Putative) function of encoded protein                                                                                 | Reference <sup>1</sup> |
|-------------------|--------------------------------------------|------------------------------------------------------------------------------------------------------------------------|------------------------|
| 7415              | <i>epsZ</i>                                | Polyprenyl glycosylphosphotransferase<br><b>New annotation: polyisoprenyl-phosphate hexose-1-phosphate transferase</b> | (2)                    |
| 7416              | <i>wzx</i> <sub>EPS</sub>                  | Wzx flippase                                                                                                           | (3)                    |
| 7417              | <i>epsY</i>                                | Polysaccharide biosynthesis/export protein<br><b>New annotation: OPX protein</b>                                       | Uniprot, KEGG          |
| 7418              | <i>epsX</i>                                | Hypothetical protein                                                                                                   |                        |
| 7420              | <i>epsW</i>                                | Response regulator                                                                                                     | (4)                    |
| 7421              | <i>epsV</i>                                | Chain length determinant protein<br><b>New annotation: Wzz protein</b>                                                 | Uniprot, KEGG          |
| 7422              | <i>epsU</i>                                | Glycosyltransferase                                                                                                    |                        |
| 7423              |                                            | Hypothetical protein                                                                                                   |                        |
| 7424              |                                            | Hypothetical protein                                                                                                   |                        |
| 7425              |                                            | Hypothetical protein                                                                                                   |                        |
| 7426              |                                            | Hypothetical protein                                                                                                   |                        |
| 7430              |                                            | Transposase orfB, IS5 family                                                                                           | Uniprot, KEGG          |
| 7431              | <i>epsP</i>                                | Transposase orfA, IS5 family                                                                                           |                        |
| 7433              | <i>epsO</i>                                | von Willebrand factor type A domain protein, Ca-activated chloride channel homolog                                     |                        |
| 7435              | <i>epsN</i>                                | Hydrolase                                                                                                              |                        |
| 7436              | <i>epsM</i>                                | Outer membrane efflux protein, cobalt-zinc-cadmium efflux system                                                       |                        |
| 7437              | <i>epsL</i>                                | Heavy metal efflux pump, CzcA family, cobalt-zinc-cadmium resistance protein                                           | Uniprot, KEGG          |
| 7438              | <i>epsK</i>                                | putative cobalt-zinc-cadmium resistance protein                                                                        | Uniprot, KEGG          |
| 7439              | <i>epsJ</i>                                | Sensor histidine kinase                                                                                                |                        |
| 7440              | <i>epsI</i><br><i>nla24</i>                | Sigma-54 dependent DNA-binding response regulator                                                                      | (5)                    |
| 7441              | <i>epsH</i>                                | Glycosyltransferase                                                                                                    |                        |
| 7442              | <i>sgnF</i> ,<br><i>wzy</i> <sub>EPS</sub> | Putative membrane protein, Wzy_C domain<br><b>New annotation: Wzy polymerase</b>                                       | (6)                    |
| 7443              | <i>epsG</i>                                | Magnesium transporter                                                                                                  |                        |
| 7444              | <i>epsF</i>                                | Response regulator/sensory box histidine kinase                                                                        |                        |
| 7445              | <i>epsE</i>                                | Glycosyltransferase                                                                                                    |                        |
| 7447              |                                            | Hypothetical protein                                                                                                   | Uniprot, KEGG          |
| 7448              | <i>epsD</i>                                | Glycosyltransferase                                                                                                    |                        |
| 7449              | <i>epsC</i>                                | Serine O-acetyltransferase                                                                                             |                        |
| 7450              | <i>epsB</i>                                | Glycosyl hydrolase                                                                                                     | Uniprot, KEGG          |
| 7451              | <i>epsA</i>                                | Glycosyltransferase                                                                                                    | Uniprot, KEGG          |

<sup>1</sup>Based on (7) unless indicated otherwise.

**Table S2.** Analysis of the *MXAN\_1025-MXAN\_1052* and *MXAN\_1915* loci

| Locus tag<br>MXAN | Gene name   | (Putative) function of encoded protein                                                                           | Reference <sup>1</sup> |
|-------------------|-------------|------------------------------------------------------------------------------------------------------------------|------------------------|
| 1025              |             | Bacterial tyrosine kinase, Capsular exopolysaccharide family protein<br><b>New annotation: Wzc</b>               | (8)                    |
| 1026              |             | Glycosyltransferase                                                                                              |                        |
| 1027              |             | Glycosyltransferase                                                                                              |                        |
| 1028              |             | Putative membrane protein                                                                                        |                        |
| 1029              |             | Glycosyltransferase                                                                                              |                        |
| 1030              |             | Glycosyltransferase                                                                                              |                        |
| 1031              |             | Glycosyltransferase                                                                                              |                        |
| 1032              |             | Glycosyltransferase                                                                                              |                        |
| 1033              |             | Glyco_trans_4-like_N domain-containing protein                                                                   |                        |
| 1034              |             | Conserved domain protein                                                                                         |                        |
| 1035              |             | Putative membrane protein, PST family<br><b>New annotation: Wzx flippase</b>                                     |                        |
| 1036              |             | Glycosyltransferase                                                                                              |                        |
| 1037              |             | Glycosyltransferase                                                                                              |                        |
| 1038              |             | Hypothetical protein                                                                                             |                        |
| 1039              | <i>glkA</i> | Glucokinase                                                                                                      |                        |
| 1040              |             | Sulfatase family protein                                                                                         |                        |
| 1041              |             | Acyltransferase family protein                                                                                   |                        |
| 1042              |             | Glycosyltransferase                                                                                              |                        |
| 1043              |             | Glycosyltransferase<br><b>New annotation: polyisoprenyl-phosphate N-acetylhexosamine-1-phosphate transferase</b> |                        |
| 1045              |             | Hypothetical protein                                                                                             |                        |
| 1046              |             | FG-GAP repeat/HVR domain protein                                                                                 |                        |
| 1047              |             | Hypothetical protein                                                                                             |                        |
| 1048              |             | UDP-glucose 6-dehydrogenase                                                                                      |                        |
| 1049              |             | Acyltransferase family protein                                                                                   |                        |
| 1050              |             | Hypothetical protein                                                                                             |                        |
| 1051              |             | Hypothetical protein                                                                                             |                        |
| 1052              |             | O-antigen polymerase family protein<br><b>New annotation: Wzy polymerase</b>                                     |                        |
|                   |             |                                                                                                                  |                        |
| 1914              | <i>suhB</i> | Inositol-1-monophosphatase                                                                                       |                        |
| 1915              |             | Polysaccharide biosynthesis/export protein<br><b>New annotation: OPX protein</b>                                 |                        |
| 1916              |             | Hypothetical protein                                                                                             |                        |
| 1917              |             | Hypothetical protein                                                                                             |                        |

<sup>1</sup>Based on Uniprot and KEGG, unless indicated otherwise.



**Table S3.** Oligonucleotides used in this work<sup>1</sup>

| Primer name           | Sequence 5'-3'                       | Brief description                                                       |
|-----------------------|--------------------------------------|-------------------------------------------------------------------------|
| 7415_A                | ATCGGGTACCGTGGTGCTCGCCGTCACTGG       | For $\Delta$ MXAN_7415                                                  |
| 7415_B                | CACCGGCACCGGGGCCAGCTTGGGCGG          | For $\Delta$ MXAN_7415                                                  |
| 7415_C                | CTGGCCCCGGTGCCGGTGGTGCTCACG          | For $\Delta$ MXAN_7415                                                  |
| 7415_D                | ATCGTCTAGACCCCCGCCACACCAGCTT         | For $\Delta$ MXAN_7415                                                  |
| 7415_E                | ACCTCCTGGCCGCCATGAG                  | For $\Delta$ MXAN_7415                                                  |
| 7415_F                | CTTACCGCCTCGGACGCCA                  | For $\Delta$ MXAN_7415                                                  |
| 7415_G                | CATCTTCTGGCCGGTGACGC                 | For $\Delta$ MXAN_7415                                                  |
| 7415_H                | GCATGTAGAAGGGCTTGCCG                 | For $\Delta$ MXAN_7415                                                  |
| 7415 Pnat900<br>forw2 | ATCGGGTACCTGAGCCTTCTCGACGTGGAGC<br>G | For complementation fw                                                  |
| 7415 Pnat rev         | ATCGTCTAGACTAGCTGGCGCCGCGGCCCG       | For complementation rev                                                 |
| 7415 fw +1            | ATCGTCTAGAGGTGGACACGATGAGCGGCGC      | For protein expression<br>under an arabinose<br>inducible promoter fw.  |
| 7415 rev new          | ATCGAAGCTTCTAGCTGGCGCCGCGGCCCG       | For protein expression<br>under an arabinose<br>inducible promoter rev. |
| 7416_A                | ATCGGGTACCGCAGCTTCGCGTGGGGCAGA       | For $\Delta$ MXAN_7416                                                  |
| 7416_B                | TTCGGGCGCTTGGAGCCCGTTGCGCAC          | For $\Delta$ MXAN_7416                                                  |
| 7416_C                | GGGCTCCAAGCGCCGAAGCCGCGCCC           | For $\Delta$ MXAN_7416                                                  |
| 7416_D                | ATCGTCTAGAGCGCCCTCGGCGTGGATGA        | For $\Delta$ MXAN_7416                                                  |
| 7416_E                | TGAAGTTCACCTCCAAGGGC                 | For $\Delta$ MXAN_7416                                                  |
| 7416_F                | TCCACCACCACACGTACC                   | For $\Delta$ MXAN_7416                                                  |
| 7416_G                | CGAGGTGCGCCAGCTCGTCT                 | For $\Delta$ MXAN_7416                                                  |
| 7416_H                | CCCATCAGCCCCACCCACAG                 | For $\Delta$ MXAN_7416                                                  |
| 7416_Pnat forw2       | ATCGAAGCTTTGACAAGCCTCCAGGCAACCCAA    | For complementation fw                                                  |
| 7416_Pnat rev         | ATCGTCTAGATCACGGGGTGGGCGCGGCTT       | For complementation rev                                                 |
| 7417_A                | ATCGGAATTCGATGATGCTCATCGTCCTGG       | For $\Delta$ MXAN_7417                                                  |
| 7417_B                | GTCACCGGGGCGGTGCGTGGACGGCAT          | For $\Delta$ MXAN_7417                                                  |
| 7417_C                | ACGCACCGCCCCGGTGACGTGGTGGTG          | For $\Delta$ MXAN_7417                                                  |
| 7417_D                | ATCGTCTAGAGCCGCTGATGGAGAAGCCGC       | For $\Delta$ MXAN_7417                                                  |
| 7417_E                | GCGCCGCTCGCTGGAGGGCA                 | For $\Delta$ MXAN_7417                                                  |
| 7417_F                | CGCGGGCGGGCCCGTCCAGG                 | For $\Delta$ MXAN_7417                                                  |
| 7417_G                | CGTCCCTGGCGCTCGTTCGC                 | For $\Delta$ MXAN_7417                                                  |
| 7417_H                | CGCAGGCGGAAGGTGGGCGC                 | For $\Delta$ MXAN_7417                                                  |
| 7417_PpilA forw       | ATCGTCTAGAGTGAGGAGAGTTCCACCGCT       | For complementation fw                                                  |
| 7417_PpilA rev        | ATCGAAGCTTTTATTCCACCACCACCGT         | For complementation rev                                                 |
| 7421_A                | ATCGGGTACCCCTGCCAGCCAAGGCGGCG        | For $\Delta$ MXAN_7421                                                  |

|                  |                                   |                         |
|------------------|-----------------------------------|-------------------------|
| 7421_B           | CGCCAGCACGGGAGCCCCGGGCGCGGG       | For $\Delta$ MXAN_7421  |
| 7421_C           | GGGGCTCCCGTGCTGGCGGAGCTGGAG       | For $\Delta$ MXAN_7421  |
| 7421_D           | ATCGTCTAGAGCCAGGACGCCGTGGGGTTC    | For $\Delta$ MXAN_7421  |
| 7421_E           | CGTGCGGCAAACCTGGTATTC             | For $\Delta$ MXAN_7421  |
| 7421_F           | AGGGCAATGGTCATCAGCCG              | For $\Delta$ MXAN_7421  |
| 7421_G           | GAGCGCCCGGAGACGAACGC              | For $\Delta$ MXAN_7421  |
| 7421_H           | CGCGAAGATGCCCATGCCGA              | For $\Delta$ MXAN_7421  |
| 7421_PpilA forw  | ATCGTCTAGAGTGACGGTCCCCGCGCCCGG    | For complementation fw  |
| 7421_PpilA rev   | ATCGAAGCTTTTCAGCGCCGCTCCAGCTCCG   | For complementation rev |
| 7442_A           | ATCGGGTACCGGGCAGACCGCCATTGAGCG    | For $\Delta$ MXAN_7421  |
| 7442_B           | GGAGGATGGGGCCAACGCGACCACGGG       | For $\Delta$ MXAN_7421  |
| 7442_C           | GCGTTGGCCCCATCCTCCGCCGCGAAC       | For $\Delta$ MXAN_7421  |
| 7442_D           | ATCGTCTAGACCAGAAGGTGGGTGGCACGG    | For $\Delta$ MXAN_7421  |
| 7442_E           | CCACTCCTTCTCCCGCCGCC              | For $\Delta$ MXAN_7421  |
| 7442_F           | ATCGTCAGCGTGGTGCAGGC              | For $\Delta$ MXAN_7421  |
| 7442_G           | CGTGGGGGTGGTGTGGGTCA              | For $\Delta$ MXAN_7421  |
| 7442_H           | CCTCGTTGGGGTAGGTGATG              | For $\Delta$ MXAN_7421  |
| 7442_Pnat 600 up | ATCGAAGCTTTGAGCCCTTGGGCCAGGGCAGAC | For complementation fw  |
| 7442_Pnat rev    | ATCGTCTAGATCAGCGCGGGTTCCGCGGCGG   | For complementation rev |
| 1025_A           | ATAGGGTACCGTGACGGAGCGCAGCGCCTC    | For $\Delta$ MXAN_1025  |
| 1025_B           | ATCCTTGGAGGCGGGTTCGAAACCGGT       | For $\Delta$ MXAN_1025  |
| 1025_C           | GACCCGGCCTCCAAGGATGGGGTGGCG       | For $\Delta$ MXAN_1025  |
| 1025_D           | ACTGTCTAGAAGTAGACGAGCCGCCCCACC    | For $\Delta$ MXAN_1025  |
| 1025_E           | CTGCGCGGCCAGCTTCACCA              | For $\Delta$ MXAN_1025  |
| 1025_F           | ACCCGGCGCAGGGCCTGTAG              | For $\Delta$ MXAN_1025  |
| 1025_G           | GACGCGGTGGCGCTGGTCCA              | For $\Delta$ MXAN_1025  |
| 1025_H           | ACGAAGAGGCCGGGCACCTC              | For $\Delta$ MXAN_1025  |
| 1035_A           | ATCGGGTACCAGCCGGAGCGGTGCACCTGG    | For $\Delta$ MXAN_1035  |
| 1035_B           | CGCCGGAGTGGCTTCGGGCGCTGGGGT       | For $\Delta$ MXAN_1035  |
| 1035_C           | CCCGAAGCCACTCCGGCGAGTCCGGCG       | For $\Delta$ MXAN_1035  |
| 1035_D           | ATCGTCTAGACTTCCAGGCCCGCACGCACC    | For $\Delta$ MXAN_1035  |
| 1035_E           | GCTTCCAGCCGCTCATGCCG              | For $\Delta$ MXAN_1035  |
| 1035_F           | TAATCACCGCCTCCGGGCAG              | For $\Delta$ MXAN_1035  |
| 1035_G           | GCGGCCTCCCTGGGCGTGTT              | For $\Delta$ MXAN_1035  |
| 1035_H           | AGCGCCTGCGCCACCACACC              | For $\Delta$ MXAN_1035  |
| 1043_A           | ATCGGAATTCATGCCGAAGGCGTGCCTT      | For $\Delta$ MXAN_1043  |
| 1043_B           | CAGGCGTCCGAAGAAGGCGACCAGAAG       | For $\Delta$ MXAN_1043  |
| 1043_C           | GCCTTCTTCGGACGCCTGGTTCGCGATG      | For $\Delta$ MXAN_1043  |
| 1043_D           | ATCGAAGCTTCCCTCCAGCGCCTCGCCCCA    | For $\Delta$ MXAN_1043  |
| 1043_E           | CGCGGAGATGGTGGCCGTCG              | For $\Delta$ MXAN_1043  |
| 1043_F           | CGTCTCCGCCCGCGCCAGCA              | For $\Delta$ MXAN_1043  |
| 1043_G           | TGGGGATGGCTGGACCAGGC              | For $\Delta$ MXAN_1043  |

|                |                                |                        |
|----------------|--------------------------------|------------------------|
| 1043_H         | TGTTGGCGAAGTTCAGCGCC           | For $\Delta$ MXAN_1043 |
| 1052_A         | ATCGGGTACCTTGATGGAGCAGTCGCACAG | For $\Delta$ MXAN_1052 |
| 1052_B         | CTCGCCATCAGAGGCACTGCGGGAAGC    | For $\Delta$ MXAN_1052 |
| 1052_C         | AGTGCCTCTGATGGCGAGGCTCGGGAC    | For $\Delta$ MXAN_1052 |
| 1052_D         | ATCGGGATCCCTCGAACCCCTGTACGGCGC | For $\Delta$ MXAN_1052 |
| 1052_E         | GCGAAGGCACAGCTCCTTCT           | For $\Delta$ MXAN_1052 |
| 1052_F         | GGATGAAGACGGGAGAGCGC           | For $\Delta$ MXAN_1052 |
| 1052_G         | GCTCGTCGTGGTGTGTCCGC           | For $\Delta$ MXAN_1052 |
| 1052_H         | CGAAGAACGCATCCGCGCCA           | For $\Delta$ MXAN_1052 |
| 1915_A         | ATCGGGTACCGCTTCCTGCCGAAGACGGCG | For $\Delta$ MXAN_1915 |
| 1915_B         | CACGAAGACGGTGAGGGCGGCGCGGAA    | For $\Delta$ MXAN_1915 |
| 1915_C         | GCCCTCACCGTCTTCGTGCCGGAGAGC    | For $\Delta$ MXAN_1915 |
| 1915_D         | ATCGTCTAGACAGGGCACCGACAGCCTGCG | For $\Delta$ MXAN_1915 |
| 1915_E         | GACTACGGCAACCTGCGAGT           | For $\Delta$ MXAN_1915 |
| 1915_F         | CCCCGACCACGCCATCCTCG           | For $\Delta$ MXAN_1915 |
| 1915_G         | TGACGCTGCCCCGCTGCTTC           | For $\Delta$ MXAN_1915 |
| 1915_H         | TCGCCGGGCTGGAGCATGAA           | For $\Delta$ MXAN_1915 |
| pilT-A EcoRI   | GCGCGAATTCGCGACTTCGAGACGGCGG   | For $\Delta$ pilT      |
| pilT-D HindIII | GCGCAAGCTTGAGCTTCTCGTTCTTCTCC  | For $\Delta$ pilT      |
| pilT_E         | CTCCGCCAGGACCCGGACATC          | For $\Delta$ pilT      |
| pilT_F         | TATCGAGGCACTGCACCA             | For $\Delta$ pilT      |
| pilT_G         | CTTGAAGACGGCGCCGCTGA           | For $\Delta$ pilT      |
| pilT_H         | CGCGCTGATTCACGAGGCAG           | For $\Delta$ pilT      |

<sup>1</sup> Underlined sequences indicate restriction sites.

## Supplementary References

1. Shi X, Wegener-Feldbrugge S, Huntley S, Hamann N, Hedderich R, Sogaard-Andersen L. 2008. Bioinformatics and experimental analysis of proteins of two-component systems in *Myxococcus xanthus*. *J Bacteriol* 190:613-24.
2. Berleman JE, Zemla M, Remis JP, Liu H, Davis AE, Worth AN, West Z, Zhang A, Park H, Bosneaga E, van Leer B, Tsai W, Zusman DR, Auer M. 2016. Exopolysaccharide microchannels direct bacterial motility and organize multicellular behavior. *ISME J* 10:2620-2632.
3. Holkenbrink C, Hoiczky E, Kahnt J, Higgs PI. 2014. Synthesis and assembly of a novel glycan layer in *Myxococcus xanthus* spores. *J Biol Chem* 289:32364-78.
4. Black WP, Wang L, Davis MY, Yang Z. 2015. The orphan response regulator EpsW is a substrate of the DifE kinase and it regulates exopolysaccharide in *Myxococcus xanthus*. *Sci Rep* 5:17831.
5. Lancero H, Caberoy NB, Castaneda S, Li YN, Lu A, Dutton D, Duan XY, Kaplan HB, Shi WY, Garza AG. 2004. Characterization of a *Myxococcus xanthus* mutant that is defective for adventurous motility and social motility. *Microbiology-Sgm* 150:4085-4093.
6. Youderian P, Burke N, White DJ, Hartzell PL. 2003. Identification of genes required for adventurous gliding motility in *Myxococcus xanthus* with the transposable element mariner. *Mol Microbiol* 49:555-70.
7. Lu A, Cho K, Black WP, Duan XY, Lux R, Yang Z, Kaplan HB, Zusman DR, Shi W. 2005. Exopolysaccharide biosynthesis genes required for social motility in *Myxococcus xanthus*. *Mol Microbiol* 55:206-20.
8. Kimura Y, Kato T, Mori Y. 2012. Function analysis of a bacterial tyrosine kinase, BtkB, in *Myxococcus xanthus*. *FEMS Microbiol Lett* 336:45-51.
